# Supplementary material
Source: PubMed Central journal article supplement (PMC4646859)
Supplement: 13280_2015_670_MOESM1_ESM.pdf [file 13280_2015_670_MOESM1_ESM.pdf]

***AMBIO***

Electronic Supplementary Material

*This supplementary material has not been peer reviewed.*

**Title: A functional-dynamic reflection on participatory processes in modeling projects**

Author: Roman Seidl

Table S1

| First author (et al.)          | Year | Topic                                                                  | Main purpose of article                                                                                                                       | Functions of participation | Dynamics/phases                                          | Participatory events                  | Degrees of involvement                                                  | Functional-dynamic reflection                                                                                                               | Type of stakeholders                                        | Number of stakeholders                                                   | Modeling method                                                                      | Additional comment                                                                          |
|--------------------------------|------|------------------------------------------------------------------------|-----------------------------------------------------------------------------------------------------------------------------------------------|----------------------------|----------------------------------------------------------|---------------------------------------|-------------------------------------------------------------------------|---------------------------------------------------------------------------------------------------------------------------------------------|-------------------------------------------------------------|--------------------------------------------------------------------------|--------------------------------------------------------------------------------------|---------------------------------------------------------------------------------------------|
| <b>Barnaud et al.</b>          | 2013 | Spatial representation in a participatory model                        | Address and discuss contested spatial issues within a participatory modeling approach                                                         | 2, 7, 8                    | Rough process description, but no explicit timeline      | Number of workshops                   | Cooperation (partly role playing games)                                 | No reflection on that                                                                                                                       | Villagers and foresters                                     | Pre-phase interviews (N = 30); later: n. a. (reference to other article) | Agent based modeling                                                                 | Typical companion modeling approach with lessons learned regarding contested spatial issues |
| <b>Batten</b>                  | 2009 | Utilize the companion modeling approach for industrial symbiosis       | Highlight issues by means of the national electricity market simulator (an integrated MAS)                                                    | 2, 3, 4, 5,                | n. a.                                                    | n. a.                                 | Cooperation (partly role playing games)                                 | No reflection on that                                                                                                                       | n. a.                                                       | n. a.                                                                    | Agent based modeling                                                                 | Companion modeling approach only conceptually                                               |
| <b>Beall et al.</b>            | 2008 | Endangered wildlife systems                                            | Highlight knowledge integration by participatory system dynamics modeling                                                                     | 1, 5, 8                    | Process description but no explicit timeline             | Meetings; discussions                 | Information to cooperation                                              | Process description but no explicit reflection                                                                                              | Ranchers, farmers and land managers                         | 9-11 people (9 stakeholder groups)                                       | System Dynamics                                                                      |                                                                                             |
| <b>Cabrera et al.</b>          | 2008 | Sustainability in dairy farm systems                                   | Describe an interactive and iterative process of collaboration                                                                                | 1, 2, 6, 5                 | Detailed timeline with types of participation            | Interviews, Interaction, focus groups | Information, consultation, cooperation (?)                              | Interactive/functional and dynamic                                                                                                          | Farmers, farm managers, consultants, etc.(detailed table)   | > 10                                                                     | Biophysical and socioeconomic model (based on MS Excel®)                             |                                                                                             |
| <b>Campo et al.</b>            | 2010 | Research and development project using the companion modeling approach | Describe multiple methods of model evaluation                                                                                                 | 6, 7, 8                    | Schematic, detailed timeline with types of participation | Role playing games                    | Cooperation                                                             | Process view and explicitly dynamic mutual learning                                                                                         | Government, NGOs, community (detailed table)                | 59                                                                       | Agent based modeling                                                                 | Focus on mutual learning among stakeholders                                                 |
| <b>de Mey et al.</b>           | 2011 | Integrated assessment model for sustainable farming                    | Illustrate the stakeholder involvement to implement a monitoring tool                                                                         | 6, 8                       | Schematic timeline with types of stakeholders involved   | Discussion groups                     | Information, consultation                                               | Explicitly functional-dynamic                                                                                                               | Scientists, advisers, farmers                               | 8-12 farmers; one model developer and one or two advisers                | Visual multi-level assessment model                                                  |                                                                                             |
| <b>deReynier et al.</b>        | 2010 | Integrated ecosystem assessment                                        | Support decision makers by urging them to use ecosystem based management approach                                                             | 3, 4, 5, 6, 8              | Process description but no explicit timeline             | Meetings                              | Information, consultation                                               | Explicitly functional-dynamic                                                                                                               | n. a.                                                       | n. a.                                                                    | Management strategy evaluation; ecosystem model                                      |                                                                                             |
| <b>Elbakidze et al.</b>        | 2010 | Multi-Stakeholder process                                              | Stakeholder analysis and multi-stakeholder collaboration in the long-term                                                                     | 5, 7, 8                    | Process description but no explicit timeline             | Qualitative interviews                | Information to cooperation (different for different stakeholder groups) | Dynamic perspective (but with different approaches, such as the participation ladder paradigm)                                              | Civil, private, public                                      | > 10                                                                     | Model Forest                                                                         | No actual modeling but stakeholder analysis                                                 |
| <b>Espinoza-Tenorio et al.</b> | 2013 | Fishery Management                                                     | The insights from this research aid in defining holistic management policies and support spatial allocations of use rights in local fisheries | 1, 2, (5?)                 | Detailed structure description, but no explicit timeline | Interviews, workshops; fieldwork      | Consultation                                                            | No reflection on that; not explicitly mentioned                                                                                             | Fishermen                                                   | > 10                                                                     | Qualitative ecosystem modeling (loop analysis), Geographic Information Systems (GIS) | Immersed themselves in a "case encounter"                                                   |
| <b>Franzén et al.</b>          | 2011 | Integrated modeling with stakeholder process                           | Scenario development for eutrophication management                                                                                            | 2, 3, 5, 7                 | Detailed timeline with types of participation            | Meetings                              | Information, consultation                                               | Explicitly functional-dynamic                                                                                                               | Policy makers, actors, customers                            | > 10                                                                     | Coupled ecological, economic, and social model                                       |                                                                                             |
| <b>Gaddis et al.</b>           | 2010 | Community water resource problem and participatory modeling            | Describe process: Stakeholders participating collecting data, creating the model, develop policy scenarios and interpret results              | 1, 2, 3, 4, 7, 8           | Timeline with types of participation                     | Workshops                             | Up to collaboration (e. g. model selection and development)             | Reflective process monitoring. Not explicit functional-dynamic perspective. But explicit reflection on different functions of participation | Different stakeholder groups, citizens                      | n. a.                                                                    | Simple mass-balance models; spatially explicit Landscape Modeling Framework          | Tendency towards "The more the better" in sense of the ladder of participation              |
| <b>Gaube et al.</b>            | 2009 | Stock-flow models and participative analysis                           | Discuss integrated socio-ecological model                                                                                                     | 2, 5, 6                    | Process description but no explicit timeline             | Group meetings                        | Up to cooperation (Agent based modeling model)                          | Dynamic perspective but no explicit reflection on functional process                                                                        | Municipal administration; business managers, women, farmers | n. a.                                                                    | Agent based modeling, land-use change model, stock-flow model, scenario analysis     |                                                                                             |

|                               |                                                                                                     |                                                                                                                                                 |               |                                                           |                                       |                             |                                                                                                      |                                                                                     |                                                    |                                                                                                |                                                                              |
|-------------------------------|-----------------------------------------------------------------------------------------------------|-------------------------------------------------------------------------------------------------------------------------------------------------|---------------|-----------------------------------------------------------|---------------------------------------|-----------------------------|------------------------------------------------------------------------------------------------------|-------------------------------------------------------------------------------------|----------------------------------------------------|------------------------------------------------------------------------------------------------|------------------------------------------------------------------------------|
| <b>Gouttenoire et al.</b>     | 2013 Livestock farming systems                                                                      | Show the usefulness of causal mapping with stakeholders (farmers) to help them redesign their livestock farming systems                         | 1, 2, 8       | Process description but no explicit timeline              | Interviews, workshop                  | Consultation, cooperation   | No reflection on that                                                                                | Farmers                                                                             | > 10                                               | Causal maps                                                                                    |                                                                              |
| <b>Haapasaari et al.</b>      | 2013 Integrated Fisheries Model                                                                     | Use of participatory modeling to inform a Bayesian model                                                                                        | 4, 6, 8       | Schematic steps and description but not explicit timeline | Six modeling workshops, final meeting | Consultation, cooperation   | Explicit process illustration - functional-dynamic                                                   | Resource user groups, NGOs, managers, decision makers, researchers                  | Average number: 10                                 | Bayesian Belief Networks                                                                       | Essential role of the facilitator; legitimacy; social learning               |
| <b>Haase</b>                  | 2013 Flood risk management                                                                          | Characterize prevailing flood risk management<br><br>Discover respective vulnerabilities and identify barriers and options of adaptive capacity | (1), 2        | Schematic, detailed timeline with types of participation  | Interviews, workshops                 | Information, consultation   | Explicit process description (but no functional-dynamic reflection)                                  | Municipal and village council heads; national scientists                            | n. a.                                              | System Dynamics                                                                                |                                                                              |
| <b>Lagabrielle et al.</b>     | 2010 Companion modeling approach for biodiversity integration in land-use planning                  | Report of three participatory modeling sequences                                                                                                | 2, 3, 4, 8    | Timeline description with types of participation          | Workshops                             | Information, consultation   | No reflection on that                                                                                | Researchers; National Parks authority, civil society                                | > 10                                               | Agent based modeling                                                                           | Partly reflective on functions of participation (during the three sequences) |
| <b>Landström et al.</b>       | 2011 Coproduction of flood risk knowledge in participatory modeling approach with competency groups | Review and illustrate the participatory modeling approach with competency groups                                                                | 1, 7          | Timeline description with types of participation          | Three workshops (competency groups)   | Cooperation                 | Expertise as "situational"                                                                           | Interdisciplinary scientists, local residents                                       | 6 to 7 project team members and 5- 8 local members | Hydrological model                                                                             |                                                                              |
| <b>Langsdale et al.</b>       | 2009 Multidisciplinary modeling with stakeholders for water resources                               | Highlight the use of workshops within a river basin                                                                                             | 1, 2, 4, 7    | Detailed timeline with types of participation             | Group meetings; five workshops        | Cooperation                 | Reflective on process and functions; less on dynamic but more on evaluative aspects                  | Provincial ministries, local government agencies, and environmental NGOs            | 10 -19                                             | System Dynamics                                                                                |                                                                              |
| <b>Leclerc et al.</b>         | 2009 Action research project on land use modeling experiment                                        | Critically reflect on adapted companion modeling approach                                                                                       | 1, 2, 5, 7    | Detailed timeline with types of participation             | Six workshops                         | Cooperation                 | Not explicitly reflected on that                                                                     | Extensive table; farmers, state officials, local technicians, etc.                  | n. a.                                              | Farm-level optimization model; regional land use change simulation model; Agent based modeling | Reflective and critical but not very systematic                              |
| <b>Martínez-Santos et al.</b> | 2010 Conflictive water management                                                                   | Reflection on the role of participative modeling in conflicting settings                                                                        | 1, 3, 8       | Timeline with types of participation                      | Meetings                              | Up to collaboration         | No reflection on that                                                                                | Water management, farmers, environmental NGOs                                       | 15 - 30                                            | Groundwater flow model; Bayesian Belief network                                                | Stakeholders define research goals                                           |
| <b>Mazzorana et al.</b>       | 2012 Scenarios for hazard assessment and subsequent modeling                                        | Demonstrate structured knowledge integration                                                                                                    | 3             | Process description but no explicit timeline              | n. a.                                 | Consultation                | Only the first phase of a modeling approach. No reflection on the whole process                      | Professional experience in applied natural hazard management                        | 10                                                 | Formative Scenario Analysis                                                                    |                                                                              |
| <b>Millington et al.</b>      | 2011 Agent based model for <i>Land Use and Cover Change</i> on wildfire regimes                     | Presentation of a case study with local stakeholders' model evaluation                                                                          | 3, 4, 7       | Process description but no explicit timeline              | Interviews                            | Consultation                | No explicit reflection on functional-dynamic perspective. But reflection on degrees of participation | Farmers, land-use planners, real estate agents, etc.                                | 7                                                  | Agent based modeling                                                                           | Substantive consultation for the evaluation of model results                 |
| <b>Molina et al.</b>          | 2011 Integrated Assessment for the European Water Framework Directive                               | Describe and interdisciplinary exercise with scenario development and participatory modeling                                                    | 2, 3, 4, 6, 7 | Process description but no explicit timeline              | Questionnaire, meetings               | Consultation to cooperation | Functional-dynamic process reflection                                                                | Detailed table provided: River basin authorities; water supply, agriculture, etc.   | 23                                                 | Bayesian Networks                                                                              |                                                                              |
| <b>Naivinit et al.</b>        | 2010 Simulation of rice production and labor migration                                              | Companion Modeling to facilitate local participatory process - local problem solving, shared representation among stakeholders                  | 2, 5, 7, 8    | Detailed timeline with types of participation             | Workshops                             | Consultation                | Functional-dynamic: but no explicit reflection ()                                                    | Farmers                                                                             | 11                                                 | Agent based modeling                                                                           | Mainly workshops with stakeholders                                           |
| <b>Ritzema et al.</b>         | 2010 Data scarcity in modeling for environmental planning                                           | Investigate the role of stakeholders to help with data scarcity and address knowledge                                                           | 2, 4, 8       | Detailed timeline with types of participation             | Workshops, survey                     | consultation, cooperation   | Reflection on the degree of participation (functional dynamic, but no different stakeholders)        | Farmers, fishermen, land owners, NGO's, government agencies, research organizations | > 10                                               | One-dimensional, non-steady state model for water movement and water quality                   |                                                                              |

|                           |                                                                     |                                                                                                 |               |                                                          |                                                |                                                                           |                                                                                          |                                                                                                                    |                                                         |                                                                        |                                                                                                                             |
|---------------------------|---------------------------------------------------------------------|-------------------------------------------------------------------------------------------------|---------------|----------------------------------------------------------|------------------------------------------------|---------------------------------------------------------------------------|------------------------------------------------------------------------------------------|--------------------------------------------------------------------------------------------------------------------|---------------------------------------------------------|------------------------------------------------------------------------|-----------------------------------------------------------------------------------------------------------------------------|
| <b>Röckmann et al.</b>    | 2012 Fishery Management                                             | Analysis and description of participatory processes in four case studies of the JAKFISH project | 1, 2, 7       | Process description but no explicit timeline             | Questionnaire, meetings                        | Consultation, cooperation, collaboration                                  | Detailed analysis of the process: purpose of participatory modeling, level and timing    | n. a.<br>(four case studies)                                                                                       | 6                                                       | Graphical modeling and Bayesian influence diagrams; bio-economic model | No model use intended                                                                                                       |
| <b>Ruankaew et al.</b>    | 2010 Integrated resource management                                 | Companion modeling approach with Role playing games and agent based modeling                    | 2, 7, 8       | Timeline with types of participation                     | Field workshops, role playing games            | Consultation                                                              | No reflection on that                                                                    | n. a.                                                                                                              | n. a.                                                   | Agent based modeling                                                   | Typical companion modeling approach                                                                                         |
| <b>Salerno</b>            | 2010 Social-ecological systems management in mountains              | Present new participatory modeling framework with case studies                                  | 1, 2, 3, 5, 7 | Timeline with types of participation                     | Workshops                                      | Consultation                                                              | Yes; fairly explicitly reflected                                                         | Resource organizations and other resource persons, including senior government officials, NGOs, WWF                | n. a.                                                   | System Dynamics                                                        |                                                                                                                             |
| <b>Sandker et al.</b>     | 2010 Conservation on the landscape                                  | Participatory modeling to implement a landscape approach to conservation and development        | 2, 4, 5, 7    | Schematic steps with functions; no explicit timeline     | Workshops                                      | Information, consultation, cooperation                                    | Explicit functions, but no reflection on dynamic aspects                                 | NGOs, policy makers, scientists                                                                                    | > 10 (6 case studies)                                   | System Dynamics                                                        | Achieving policy impacts; learning, facilitator, communication among stakeholders, "throw-away model"                       |
| <b>Simon et al.</b>       | 2010 Forest management planning                                     | Companion modeling approach with agent based modeling                                           | 2, 7, 8       | Schematic timeline with types of participation           | Discussions                                    | Consultation, collaboration                                               | Explicit process, but no reflection of functional-dynamic aspects                        | Farmers, forest managers                                                                                           | n. a.?                                                  | Agent based modeling                                                   | Typical companion modeling approach; focus on shared representation and empowerment to understand and make better decisions |
| <b>Smajgl</b>             | 2010 Sustainability in Indonesia                                    | Multi-level participatory modeling - challenge stakeholder beliefs                              | 1, 2, 4, 8    | Detailed timeline with types of participation            | Meetings, workshops                            | Consultation, collaboration                                               | Functional-dynamic process reflection                                                    | Decision makers from multiple levels of government                                                                 | n. a.                                                   | Agent based modeling                                                   | Collaboration about model started at the stage of the project proposal                                                      |
| <b>Squires et al.</b>     | 2011 Marine fisheries                                               | Case study in public participation in natural resource decision-making                          | 1, 2, 6, 8    | Timeline with types of participation                     | Meetings, workshops                            | Information to cooperation                                                | Functional-dynamic process reflection                                                    | Commercial fisheries etc. (detailed table)                                                                         | n. a.                                                   | Bio-economic modeling                                                  |                                                                                                                             |
| <b>Suwarno, et al.</b>    | 2009 Forest Management in Indonesia                                 | Participatory modeling to improve partnership schemes                                           | 1, 3          | Schematic timeline with types of stakeholders involved   | Meetings; survey interviews                    | Consultation, cooperation, collaboration (define system boundaries, etc.) | Not explicitly reflected but implicitly implemented.                                     | Members of cooperatives, forest district agency                                                                    | 7 (core team), 60 (additional from villages)            | System Dynamics                                                        |                                                                                                                             |
| <b>Thompson et al.</b>    | 2010 Knowledge about greenhouse gas emissions in an urban ecosystem | Integrate Scientist and Stakeholder Knowledge                                                   | 2, 4, 6       | Detailed timeline with types of participation            | Five workshops, questionnaire (Table overview) | Consultation, information, cooperation                                    | Functional-dynamic process reflection                                                    | City managers (local municipalities), utilities, industries, environmental NGOs, etc.                              | 45 in total                                             | System Dynamics                                                        | Mediated Modeling in Workshops                                                                                              |
| <b>van den Belt</b>       | 2013 Integrated freshwater management                               | Show the usefulness of the mediated modeling approach in a case of New Zealand                  | 2, 4          | Process description but no explicit timeline             | Six workshops                                  | Information to collaboration (joint model building)                       | Partly considered but not explicitly reflected                                           | Five stakeholder groups (industry, farming, local & regional authorities, environmental groups, indigenous people) | In total: 20                                            | System Dynamics                                                        | Mediated Modeling in Workshops (Stella Software)                                                                            |
| <b>Vayssières, et al.</b> | 2011 Sustainability of dairy enterprises                            | Interactive simulation of various management strategies with diverse stakeholders               | 5, 6          | Process description but no explicit timeline             | Immersion, visits, meetings                    | Consultation, cooperation (?)                                             | Functional-dynamic process reflection                                                    | Farmers                                                                                                            | 6                                                       | Stock-flow model                                                       | Mainly one type of stakeholders (farmers) - model tailored to these cases                                                   |
| <b>Videira, et al.</b>    | 2010 Support integrated sustainability assessment processes         | Participatory Modeling Approach                                                                 | 1, 4, 5       | Schematic, detailed timeline with types of participation | Three Workshops                                | Consultation to collaboration (model)                                     | Acknowledges different engagement levels in different phases (not explicitly functional) | Land parcel owners, representatives form 29 organizations                                                          | 14 / 43 in total (different participation per workshop) | System Dynamics                                                        | Group model building; mediated modeling; external facilitator very useful!                                                  |

|                             |                         |                                                                                                                                               |                                                                          |                    |                           |                                                                   |                                                               |                                     |                      |                                                                                                                             |
|-----------------------------|-------------------------|-----------------------------------------------------------------------------------------------------------------------------------------------|--------------------------------------------------------------------------|--------------------|---------------------------|-------------------------------------------------------------------|---------------------------------------------------------------|-------------------------------------|----------------------|-----------------------------------------------------------------------------------------------------------------------------|
| <b>Worrapimphong et al.</b> | 2010 Fishery Management | Companion Modeling to facilitate local participatory process and finally enable improved informed discussion among heterogeneous stakeholders | 2, 5, 7, 8 Schematic steps and process description; no explicit timeline | Role playing games | Consultation, cooperation | Explicit process, but no reflection of functional-dynamic aspects | Local fishermen<br>one trader<br>local government<br>officers | 24 (fishermen)<br>n. a. (officials) | Agent based modeling | Typical companion modeling approach; focus on shared representation and empowerment to understand and make better decisions |
|-----------------------------|-------------------------|-----------------------------------------------------------------------------------------------------------------------------------------------|--------------------------------------------------------------------------|--------------------|---------------------------|-------------------------------------------------------------------|---------------------------------------------------------------|-------------------------------------|----------------------|-----------------------------------------------------------------------------------------------------------------------------|

Note: n. a. = not available (that is, no information was given in the article).
